# Supplementary material for: Different effects of paternal trans-generational immune priming on survival and immunity in step and genetic offspring
Source: PubMed Central journal article supplement (PMC4240996; doi:10.1098/rspb.2014.2089), 2014-12-22
Supplement: rspb20142089supp1.pdf [file rspb20142089supp1.pdf]

Tab. 4: Statistical analysis of gene expression data. The variance of expression levels of each gene was calculated with Relative Expression Software Tool (REST 2009), based on the primer efficiencies and overall maximal/minimal Ct values providing the variance of each primer product across all samples and a pairwise comparisons against the control treatment. To correct for multiple comparisons we used the false discovery rate (FDR);Benjamini Hochberg. Shown are the effects of the factors (a) priming (none, step, genetic, both) and (b) mating order (none, second, first, both). \* = significant after FDR

| Gene                 | treatment  | mean<br>expression | <i>P</i> | treatment | mean<br>expression | <i>P</i> |
|----------------------|------------|--------------------|----------|-----------|--------------------|----------|
| <i>attacin</i>       | stepfather | 1,058              | n.s.     | first     | 1,04               | n.s.     |
| <i>attacin</i>       | father     | 1,071              | n.s.     | second    | 1,145              | n.s.     |
| <i>attacin</i>       | both       | 0,743              | n.s.     | both      | 0,743              | n.s.     |
| <i>coleopteracin</i> | stepfather | 0,918              | n.s.     | first     | 0,945              | n.s.     |
| <i>coleopteracin</i> | father     | 1,017              | n.s.     | second    | 1,015              | n.s.     |
| <i>coleopteracin</i> | both       | 1,002              | n.s.     | both      | 1,04               | n.s.     |
| <i>GNBP</i>          | stepfather | 0,908              | n.s.     | first     | 0,741              | n.s.     |
| <i>GNBP</i>          | father     | 1,024              | n.s.     | second    | 1,197              | n.s.     |
| <i>GNBP</i>          | both       | 1,04               | n.s.     | both      | 1,002              | n.s.     |
| <i>hsp68</i>         | stepfather | 0,767              | n.s.     | first     | 0,846              | n.s.     |
| <i>hsp68</i>         | father     | 1,072              | n.s.     | second    | 1,003              | n.s.     |
| <i>hsp68</i>         | both       | 0,753              | n.s.     | both      | 0,753              | n.s.     |
| <i>hsp90</i>         | stepfather | 0,831              | n.s.     | first     | 0,789              | 0,031    |
| <i>hsp90</i>         | father     | 0,89               | n.s.     | second    | 0,931              | n.s.     |
| <i>hsp90</i>         | both       | 0,763              | n.s.     | both      | 0,763              | n.s.     |
| <i>imd</i>           | stepfather | 1,042              | n.s.     | first     | 0,992              | n.s.     |
| <i>imd</i>           | father     | 0,958              | n.s.     | second    | 1,053              | n.s.     |
| <i>imd</i>           | both       | 0,865              | n.s.     | both      | 0,865              | n.s.     |
| <i>lysozyme</i>      | stepfather | 0,877              | n.s.     | first     | 0,903              | n.s.     |
| <i>lysozyme</i>      | father     | 0,996              | n.s.     | second    | 0,951              | n.s.     |
| <i>lysozyme</i>      | both       | 0,95               | n.s.     | both      | 0,95               | n.s.     |
| <i>nimB</i>          | stepfather | 1,08               | n.s.     | first     | 1,041              | n.s.     |
| <i>nimB</i>          | father     | 1,15               | n.s.     | second    | 1,368              | n.s.     |
| <i>nimB</i>          | both       | 1,11               | n.s.     | both      | 1,11               | n.s.     |
| <i>PGRP</i>          | stepfather | 1,473              | 0,026    | first     | 1,424              | 0,024    |
| <i>PGRP</i>          | father     | 1,513              | 0,028    | second    | 1,557              | 0,012    |
| <i>PGRP</i>          | both       | 1,437              | 0,044    | both      | 1,437              | 0,037    |
| <i>proPO</i>         | stepfather | 0,881              | n.s.     | first     | 0,91               | n.s.     |
| <i>proPO</i>         | father     | 0,919              | n.s.     | second    | 0,903              | n.s.     |
| <i>proPO</i>         | both       | 0,868              | n.s.     | both      | 0,868              | n.s.     |

|                  |            |       |      |        |       |      |
|------------------|------------|-------|------|--------|-------|------|
| <i>thaumatin</i> | stepfather | 0,918 | n.s. | first  | 0,934 | n.s. |
| <i>thaumatin</i> | father     | 0,913 | n.s. | second | 0,855 | n.s. |
| <i>thaumatin</i> | both       | 0,844 | n.s. | both   | 0,844 | n.s. |
| <i>toll</i>      | stepfather | 0,932 | n.s. | first  | 0,956 | n.s. |
| <i>toll</i>      | father     | 0,97  | n.s. | second | 1,004 | n.s. |
| <i>toll</i>      | both       | 0,968 | n.s. | both   | 0,968 | n.s. |
